# Supplementary material for: An Association of Influenza Epidemics in Children With Mobile App Data: Population-Based Observational Study in Osaka, Japan
Source: PubMed Central journal article supplement (PMC8874815; doi:10.2196/31131), 2022-02-10

# Supplemental Figure

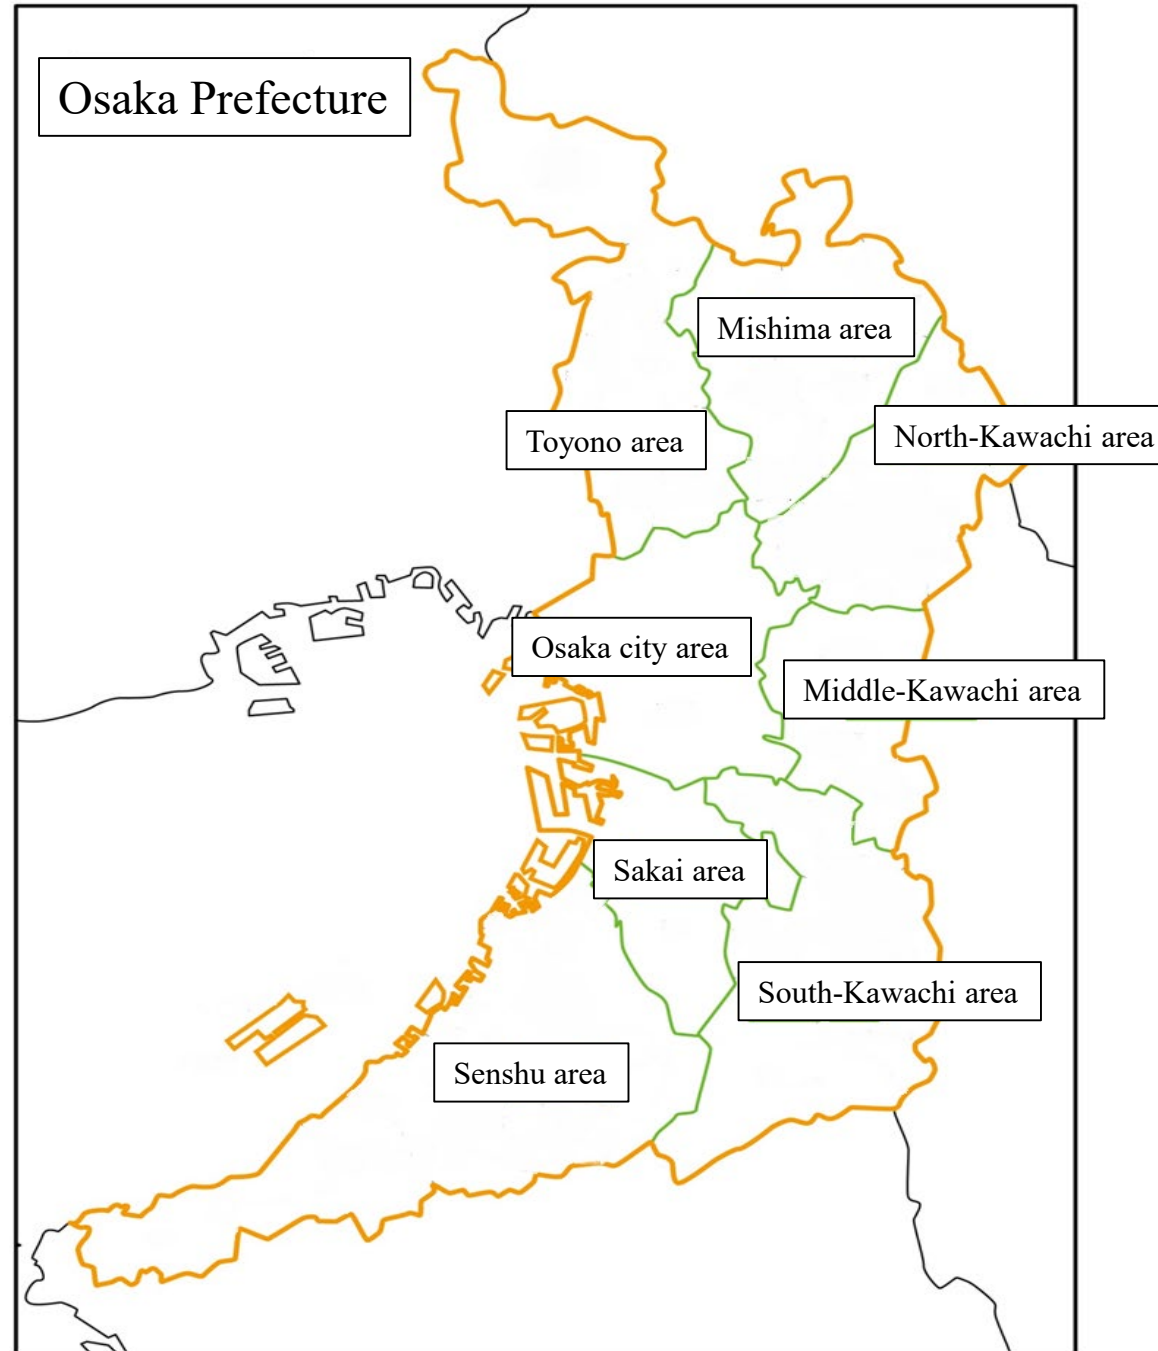

Supplement: formative_v6i2e31131_app1.pdf [file formative_v6i2e31131_app1.pdf]
